# Supplementary material for: Bioactivity-guided isolation of anticancer compounds from Euphorbia lathyris
Source: Royal Society of Chemistry journal article supplement (doi:10.1039/c5ay02204e), 2015-01-01
Supplement: c5ay02204e2.pdf [file c5ay02204e2.pdf]

### Bioactivity-guided isolation of anticancer compounds from *Euphorbia lathyris*

Shanshan Yang<sup>‡a</sup>, Jiachen Sun<sup>‡ab</sup>, Hong Lu<sup>a</sup>, Hong Ma<sup>a</sup>, Yaozhou Zhang<sup>ac\*</sup> □

<sup>a</sup> School of Pharmaceutical Science and Technology, Tianjin University, Tianjin 300072, China

<sup>b</sup> Tianjin University of Traditional Chinese Medicine, Tianjin 300193, China

<sup>c</sup> Tianjin International Joint Academy of Biomedicine, Tianjin 300457, China

\*Corresponding author: School of Pharmaceutical Science and Technology, Tianjin University, Tianjin 300072, China. Tel.: +86 18822265870. Fax: +86 22 66621537.

‡ Shanshan Yang and Jiachen Sun contributed equally to the study.

E-mail address: Yaozhou\_Zhang@163.com (Y. Zhang).

#### Supplementary information

**Table S1.** <sup>13</sup>C NMR spectroscopic data for compounds 1-6 in CDCl<sub>3</sub>, compound 7 in DMSO (100 MHz)

| No. | 1     | 2    | 3     | 4     | 5     | 6     | 7     |
|-----|-------|------|-------|-------|-------|-------|-------|
| 1   | 47.9  | 47.9 | 174.3 | 48.6  | 48.6  | 47.8  |       |
| 2   | 37.7  | 37.8 | 34.1  | 37.7  | 37.9  | 37.6  | 161.3 |
| 3   | 79.6  | 80.7 | 24.9  | 81.9  | 80.9  | 79.3  | 112.0 |
| 4   | 52.9  | 49.9 | 27.2  | 52.3  | 52.2  | 52.9  | 144.9 |
| 5   | 64.2  | 65.2 | 27.2  | 65.5  | 66.5  | 64.5  | 112.8 |
| 6   | 142.0 | 58.9 | 29.1  | 144.4 | 144.6 | 142.1 | 143.3 |
| 7   | 78.6  | 33.6 | 29.3  | 34.9  | 34.9  | 78.9  | 150.9 |
| 8   | 28.7  | 20.1 | 29.7  | 21.0  | 21.7  | 28.7  | 103.1 |
| 9   | 31.6  | 34.8 | 130.0 | 35.4  | 35.4  | 31.4  | 149.0 |
| 10  | 24.7  | 25.6 | 129.7 | 25.4  | 25.3  | 24.7  | 111.2 |
| 11  | 27.8  | 29.1 | 31.9  | 28.5  | 28.6  | 27.7  |       |

|    |       |       |      |       |       |       |
|----|-------|-------|------|-------|-------|-------|
| 12 | 142.7 | 143.7 | 29.5 | 146.7 | 146.5 | 142.2 |
| 13 | 135.5 | 136.0 | 29.1 | 134.2 | 134.2 | 135.8 |
| 14 | 197.6 | 196.9 | 29.3 | 196.5 | 196.7 | 197.6 |
| 15 | 92.0  | 91.8  | 29.1 | 92.5  | 92.5  | 91.9  |
| 16 | 14.2  | 13.6  | 29.7 | 14.2  | 14.2  | 14.1  |
| 17 | 119.8 | 55.5  | 22.7 | 115.5 | 115.4 | 119.4 |
| 18 | 28.8  | 28.9  | 14.1 | 29.0  | 29.0  | 28.9  |
| 19 | 16.7  | 16.8  |      | 16.9  | 16.8  | 16.6  |
| 20 | 12.7  | 12.4  |      | 12.5  | 12.5  | 12.8  |

**Table S2.** <sup>1</sup>H NMR data for compounds 1-6 in CDCl<sub>3</sub>, compound 7 in DMSO (400 MHz)

| position | 1        | 2      | 3      | 4        | 5        | 6      | 7     |
|----------|----------|--------|--------|----------|----------|--------|-------|
| 1        | 3.5,dd   | 3.3,dd | 4.2,dd | 3.6,dd   | 3.6 ,dd  | 3.4,dd |       |
| 1'       | 1.8,dd   | 1.4,dd | 4.2,dd | 1.7,dd   | 1.7,dd   | 1.8,dd |       |
| 2        | 2.4,m    | 2.1,m  | 2.4,t  | 2.4,m    | 2.4,m    | 2.4,m  |       |
| 3        | 5.8,t    | 5.5,t  |        | 5.9,t    | 5.9,t    | 5.8,t  | 6.1,d |
| 4        | 3.0,dd   | 1.9,m  |        | 2.9,dd   | 2.9,dd   | 2.9,dd | 7.8,d |
| 5        | 6.4,d    | 6.3,d  |        | 6.2,d    | 6.,d     | 6.4,d  | 7.0,s |
| 7        | 5.6,dd   | 1.0,t  |        | 2.2,dd   | 2.2,dd   | 5.6,dd |       |
| 7'       |          | 2.1,m  |        | 2.1,brdd | 2.0,brdd |        |       |
| 8        | 2.4,m    | 2.2,m  |        | 2.0,dddd | 2.0,dddd | 2.4,m  | 6.8,s |
| 8'       | 2,2,brdd | 1.8,m  |        | 1.7,m    | 1.7,m    | 2.2,m  |       |

|     |          |        |        |          |          |         |
|-----|----------|--------|--------|----------|----------|---------|
| 9   | 1.4,dddd | 1.1,m  | 5.3,dt | 1.2,dddd | 1.2,dddd | 1.3,ddd |
| 11  | 1.5,dd   | 1.5,dd | 2.0,m  | 1.4,dd   | 1.4,dd   | 1.6,dd  |
| 12  | 6.6,dq   | 6.6,dd |        | 6.6,dq   | 6.6,dq   | 6.5,dq  |
| 16  | 1.0,d    | 0.7,d  |        | 0.9,d    | 1.0,d    | 1.0,d   |
| 17  | 5.56,brs | 2.5,d  |        | 5.0,d    | 5.0,d    | 5.5,s   |
| 17' | 5.3,brs  | 2.3,dd |        | 4.8,brs  | 4.8,brs  | 5.3,s   |
| 18  | 1.2,s    | 1.2,s  | 0.9,t  | 1.2,s    | 1.2,s    | 1.2,s   |
| 19  | 1.3,s    | 1.3,s  |        | 1.2,s    | 1.2,s    | 1.3,s   |
| 20  | 1.8,d    | 1.9,s  |        |          | 1.7,s    | 1.8,d   |
|     |          |        |        |          |          | 1.8,d   |

**Table S3.** Crystal data and structure refinement for compound 2

|                                 |                                                                                      |
|---------------------------------|--------------------------------------------------------------------------------------|
| Compound                        | 2                                                                                    |
| Empirical formula               | C <sub>32</sub> H <sub>40</sub> O <sub>8</sub>                                       |
| Formula weight                  | 552.64                                                                               |
| Temperature                     | 293(2) K                                                                             |
| Wavelength                      | 0.71073 Å                                                                            |
| Crystal system, space group     | Orthorhombic, P2 <sub>1</sub> 2 <sub>1</sub> 2                                       |
| Unit cell dimensions            | a = 8.2474(16)Å, α = 90.00<br>b = 12.543(3)Å, β = 90.00<br>c = 29.019(6)Å, γ = 90.00 |
| Volume                          | 3001.9(10) Å <sup>3</sup>                                                            |
| Z, Calculated density           | 4, 1.223 Mg/m <sup>3</sup>                                                           |
| Absorption coefficient          | 0.064 mm <sup>-1</sup>                                                               |
| F(000)                          | 1184                                                                                 |
| Crystal size                    | 0.25 × 0.20 × 0.15 mm                                                                |
| Theta range for data collection | 3.04 to 25.50 deg.                                                                   |

|                                   |                                                                               |
|-----------------------------------|-------------------------------------------------------------------------------|
| Limiting indices                  | -8 $\cong$ h $\cong$ 9, -15 $\cong$ k $\cong$ 15,<br>-34 $\cong$ l $\cong$ 35 |
| Reflections collected / unique    | 24238 / 5565 [R(int) = 0.1286]                                                |
| Completeness to theta = 25.50     | 99.7 %                                                                        |
| Absorption correction             | 0.087 mm <sup>-1</sup>                                                        |
| Max. and min. transmission        | 0.9871 and 0.9786                                                             |
| Refinement method                 | Full-matrix least-squares on F <sup>2</sup>                                   |
| Data / restraints / parameters    | 5565/0/361                                                                    |
| Goodness-of-fit on F <sup>2</sup> | 1.019                                                                         |
| Final R indices [I > 2sigma(I)]   | R1 = 0.0668, $\omega$ R2 = 0.1111                                             |
| R indices (all data)              | R1 = 0.1205, $\omega$ R2 = 0.1260                                             |
| Absolute structure parameter      | -0.9(13)                                                                      |
| Largest diff. peak and hole       | 0.149 and -0.169 e. $\text{\AA}^{-3}$                                         |

**Table S4.** Selected Bond Lengths ( $\text{\AA}$ ) for compound 2

| Bond       | Dist.    | Bond        | Dist.    | Bond         | Dist.    |
|------------|----------|-------------|----------|--------------|----------|
| O(1)-C(3)  | 1.458(4) | C(2)-C(16)  | 1.512(5) | C(11)-C(12)  | 1.451(5) |
| O(1)-C(21) | 1.343(4) | C(2)-C(3)   | 1.528(4) | C(15)-C(1)   | 1.540(5) |
| O(2)-C(21) | 1.195(4) | C(3)-C(4)   | 1.522(4) | C(9)-C(10)   | 1.500(4) |
| O(3)-C(5)  | 1.468(3) | C(4)-C(5)   | 1.531(4) | C(9)-C(11)   | 1.536(5) |
| O(3)-C(29) | 1.359(4) | C(4)-C(15)  | 1.583(4) | C(11)-C(12)  | 1.451(5) |
| O(4)-C(29) | 1.190(4) | C(5)-C(6)   | 1.520(5) | C(15)-C(1)   | 1.540(5) |
| O(5)-C(6)  | 1.455(4) | C(6)-C(17)  | 1.475(5) | C(2)-H(2A)   | 0.9800   |
| O(5)-C(17) | 1.443(4) | C(9)-C(8)   | 1.523(4) | C(3)-H(3A)   | 0.9800   |
| O(6)-C(14) | 1.217(4) | C(9)-C(10)  | 1.500(4) | C(5)-H(5A)   | 0.9800   |
| O(7)-C(15) | 1.450(4) | C(9)-C(11)  | 1.536(5) | C(9)-H(9A)   | 0.9800   |
| O(7)-C(31) | 1.353(4) | C(11)-C(12) | 1.451(5) | C(11)-H(11A) | 0.9800   |
| O(8)-C(31) | 1.199(4) | C(15)-C(1)  | 1.540(5) |              |          |

**Table S5.** Selected Bond Angles (°) for compound 2

| Angle            | (°)       | Angle             | (°)      |
|------------------|-----------|-------------------|----------|
| C(21)-O(1)-C(3)  | 117.0(2)  | C(5)-C(6)-C(7)    | 114.8(3) |
| C(29)-O(3)-C(5)  | 117.0(3)  | C(8)-C(7)-C(6)    | 115.7(3) |
| C(17)-O(5)-C(6)  | 61.20(19) | C(9)-C(8)-C(7)    | 115.2(3) |
| C(31)-O(7)-C(15) | 115.5(3)  | C(8)-C(9)-C(10)   | 123.7(3) |
| C(2)-C(1)-C(15)  | 107.5(2)  | C(8)-C(9)-C(11)   | 123.6(3) |
| C(3)-C(2)-C(16)  | 116.6(3)  | C(10)-C(9)-C(11)  | 60.3(2)  |
| C(3)-C(2)-C(1)   | 102.3(3)  | C(19)-C(10)-C(9)  | 121.4(3) |
| C(16)-C(2)-C(1)  | 114.4(3)  | C(19)-C(10)-C(11) | 119.0(3) |
| O(1)-C(3)-C(2)   | 108.6(3)  | C(9)-C(10)-C(11)  | 61.0(2)  |
| O(1)-C(3)-C(4)   | 108.1(2)  | C(19)-C(10)-C(18) | 114.3(3) |
| C(2)-C(3)-C(4)   | 103.0(3)  | C(9)-C(10)-C(18)  | 115.8(3) |
| C(3)-C(4)-C(5)   | 116.6(2)  | C(11)-C(10)-C(18) | 115.2(3) |
| C(3)-C(4)-C(15)  | 104.1(3)  | C(12)-C(11)-C(10) | 123.5(3) |
| C(5)-C(4)-C(15)  | 116.6(2)  | C(12)-C(11)-C(9)  | 118.8(3) |
| O(3)-C(5)-C(6)   | 104.5(2)  | C(10)-C(11)-C(9)  | 58.7(2)  |
| O(3)-C(5)-C(4)   | 107.9(2)  | C(12)-C(13)-C(14) | 123.5(3) |
| C(6)-C(5)-C(4)   | 116.7(3)  | C(12)-C(13)-C(20) | 122.5(3) |
| O(5)-C(6)-C(17)  | 59.0(2)   | C(14)-C(13)-C(20) | 113.3(3) |
| O(5)-C(6)-C(5)   | 113.4(3)  | O(6)-C(14)-C(13)  | 120.4(4) |
| C(17)-C(6)-C(5)  | 124.1(3)  | O(6)-C(14)-C(15)  | 115.2(3) |
| O(5)-C(6)-C(7)   | 113.1(3)  | C(13)-C(14)-C(15) | 123.9(3) |
| C(17)-C(6)-C(7)  | 118.2(3)  | C(1)-C(15)-C(4)   | 103.9(2) |

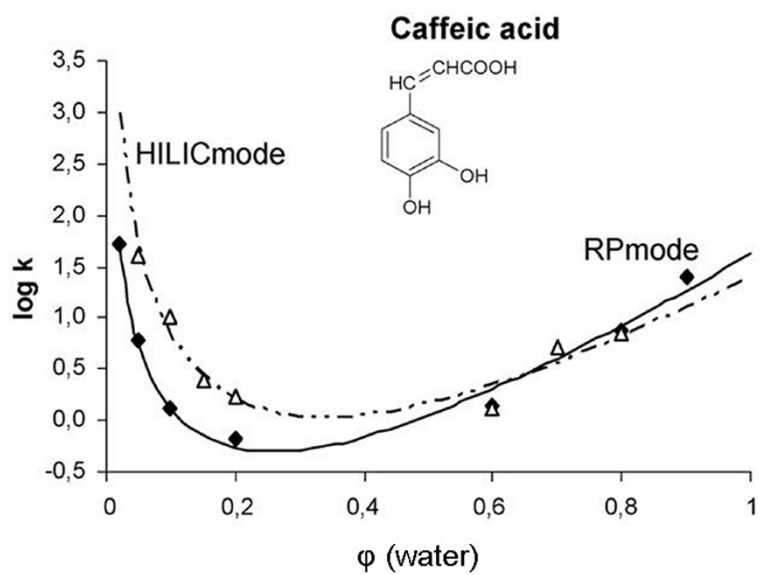

**Figure S1.** U-shape plots of the retention factors of caffeic acids,  $k$ , versus the volume fraction of water,  $\phi$  (water).
